# Supplementary material for: Inhibition of CHK1 enhances cell death induced by the Bcl-2-selective inhibitor ABT-199 in acute myeloid leukemia cells
Source: PubMed Central journal article supplement (PMC5085189; doi:10.18632/oncotarget.9185), 2016-05-05
Supplement: oncotarget-07-34785-s001.pdf [file oncotarget-07-34785-s001.pdf]

## Inhibition of CHK1 enhances cell death induced by the Bcl-2-selective inhibitor ABT-199 in acute myeloid leukemia cells

### Supplementary Materials

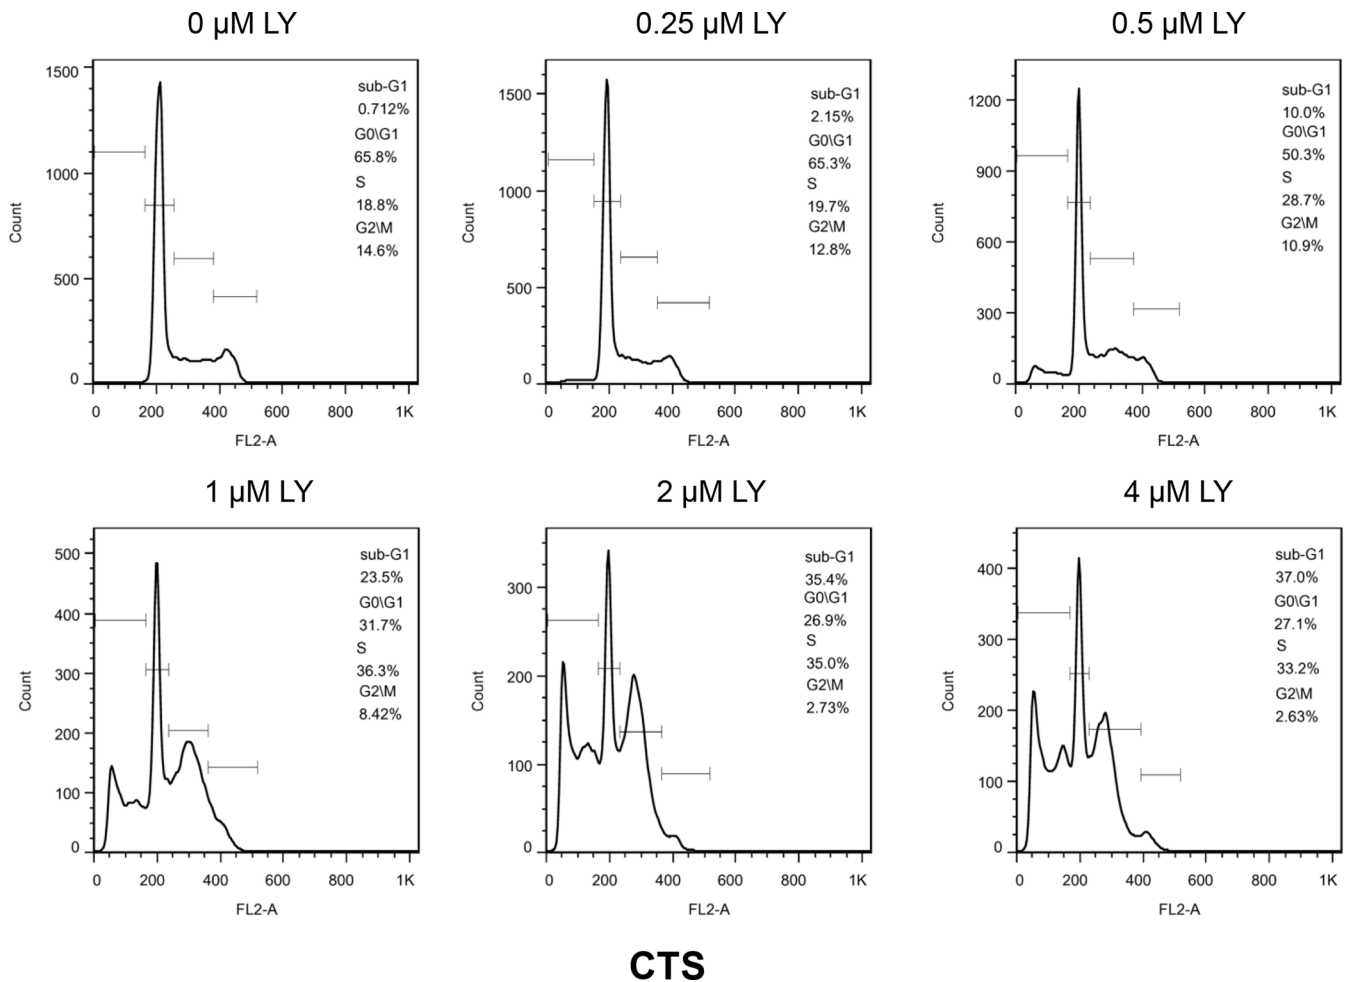

**Supplementary Figure S1: CTS cells were treated for 24 h with LY2630618 (LY), then fixed with ethanol and stained with PI for cell cycle analysis.**

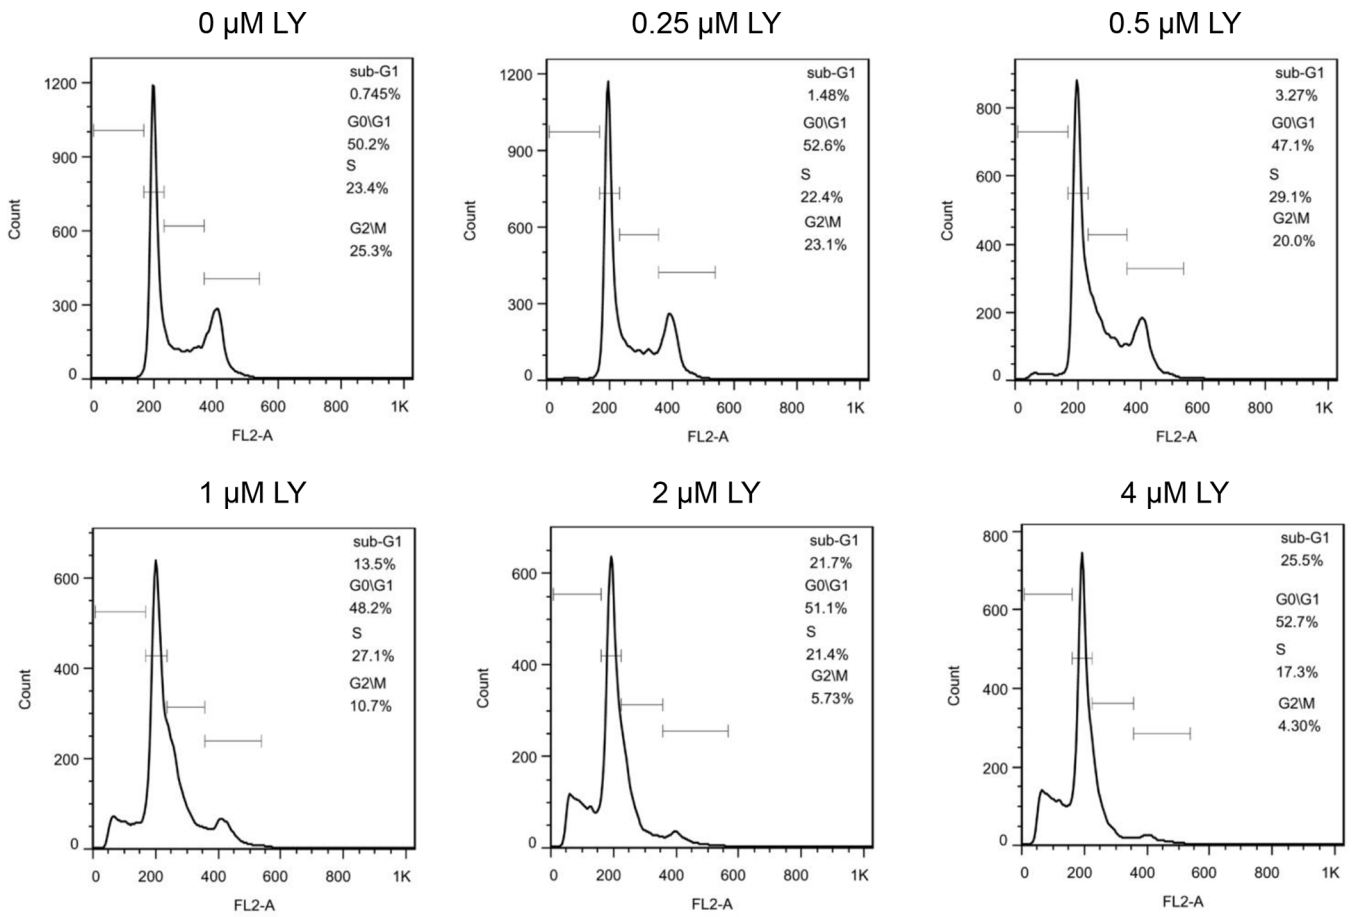

## THP-1

Supplementary Figure S2: THP-1 cells were treated for 24 h with LY, then fixed with ethanol and stained with PI for cell cycle analysis.

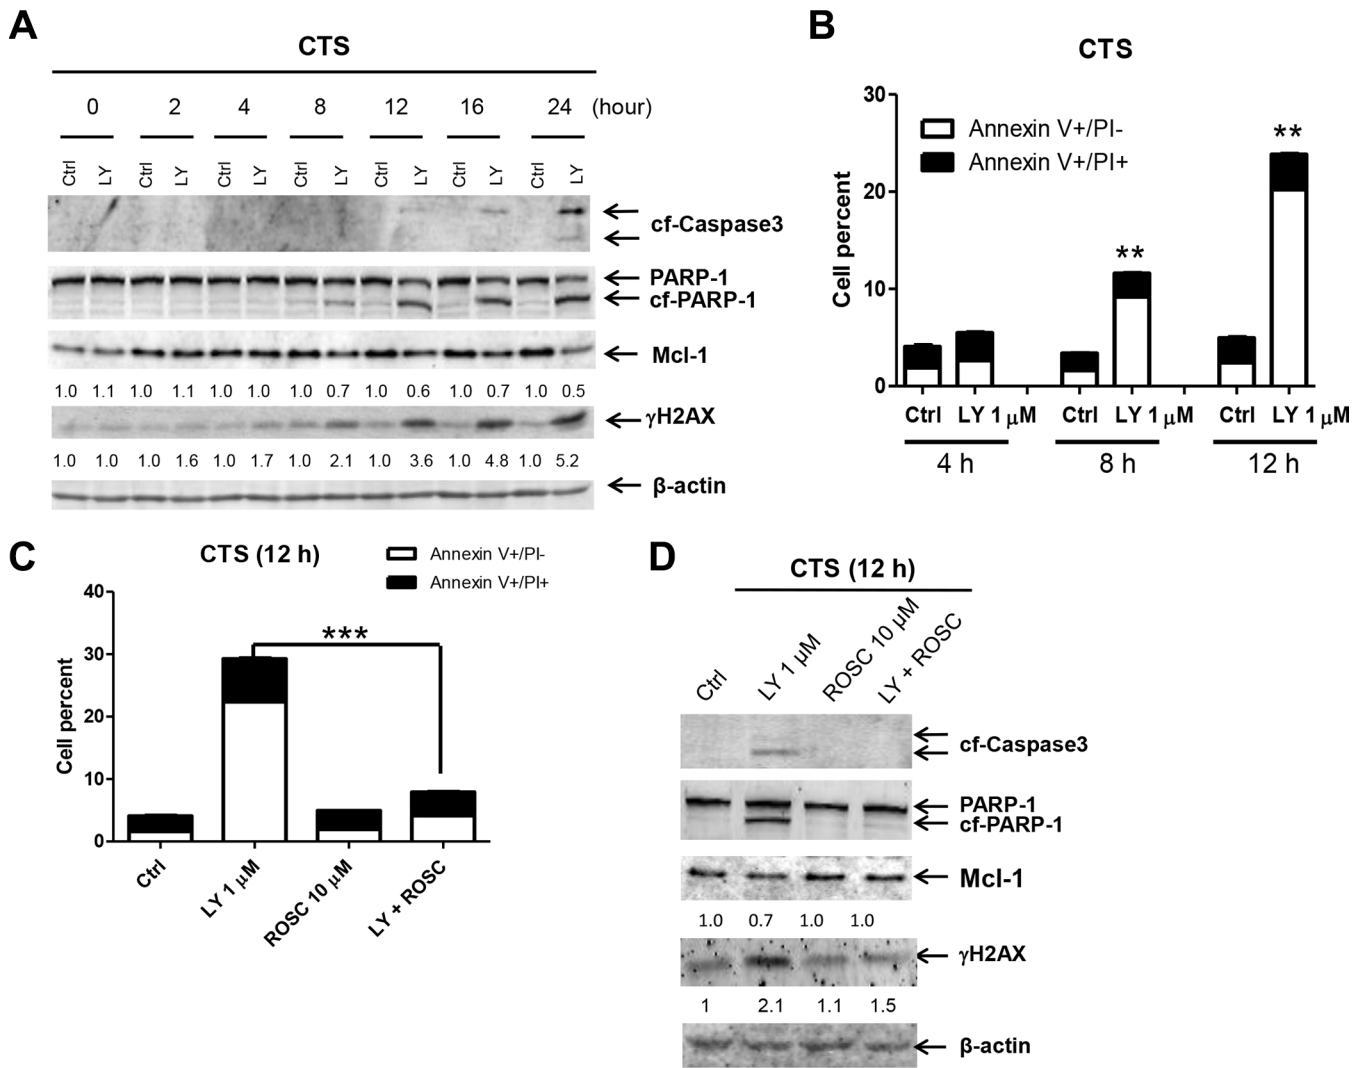

**Supplementary Figure S3:** (A) CTS cells were treated with 4 μM LY or without (control, designated ctrl) for the indicated times. Whole cell lysates were subjected to Western blotting. (B) Cells were treated with LY for 4 h, 8 h, and 12 h and then subjected to Annexin V/PI staining and flow cytometry analysis. \*\*indicates  $p < 0.005$ . (C) CTS cells were treated with LY and Roscovitine (ROSC) for 12 h. Cells were then subjected to Annexin V/PI staining and flow cytometry analysis. \*\*\*indicates  $p < 0.0005$ . (D) Whole cell lysates were subjected to Western blotting.
